# Supplementary material
Source: PubMed Central journal article supplement (PMC8805126)
Supplement: NIHMS1771692-supplement-1.pdf [file NIHMS1771692-supplement-1.pdf]

**Supplemental Table 1. Characteristics of children living with HIV and controls in Johannesburg, South Africa, by sex**

| Characteristics <sup>1</sup>                  | Boys           |                    |         | Girls          |                    |         |
|-----------------------------------------------|----------------|--------------------|---------|----------------|--------------------|---------|
|                                               | CLWH<br>(N=86) | Controls<br>(N=61) | P       | CLWH<br>(N=86) | Controls<br>(N=37) | P       |
| Age (years), Mean (SD)                        | 10.2 (1.5)     | 10.8 (1.8)         | 0.03    | 10.2 (1.4)     | 10.8 (1.7)         | 0.03    |
| Weight (kg), Mean (SD)                        | 28.3 (6.9)     | 33.8 (9.7)         | <0.0001 | 28.9 (6.6)     | 36.0 (13.2)        | 0.0001  |
| Height (cm), Mean (SD)                        | 131.3 (9.0)    | 139.1 (10.2)       | <0.0001 | 131.3 (8.7)    | 140.9 (11.3)       | <0.0001 |
| HAZ, Mean (SD)                                | -1.16 (0.9)    | -0.48 (1.0)        | <0.0001 | -1.14 (1.0)    | -0.31 (1.0)        | <0.0001 |
| BAZ, Mean (SD)                                | -0.42 (1.0)    | -0.05 (1.1)        | 0.035   | -0.21 (1.0)    | -0.16 (1.4)        | 0.82    |
| Tanner Stage, N (%)                           |                |                    |         |                |                    |         |
| 1                                             | 62 (72.1)      | 38 (62.3)          |         | 49 (57.0)      | 16 (43.2)          |         |
| 2                                             | 19 (22.1)      | 16 (26.2)          | 0.35    | 26 (30.2)      | 11 (29.7)          | 0.21    |
| 3                                             | 2 (2.3)        | 5 (8.2)            |         | 8 (9.3)        | 6 (16.2)           |         |
| 4                                             | 3 (3.5)        | 2 (3.3)            |         | 3 (3.5)        | 4 (10.8)           |         |
| ART regimen, N (%)                            |                |                    |         |                |                    |         |
| LPV/r-based                                   | 26 (30.2)      |                    |         | 23 (26.7)      |                    |         |
| EFV-based                                     | 60 (69.8)      |                    |         | 62 (72.1)      |                    |         |
| Other                                         | 0 (0.0)        |                    |         | 1 (1.2)        |                    |         |
| Plasma HIV RNA <400 (copies/mL), N (%)        | 80 (95.2)      |                    |         | 75 (91.5)      |                    |         |
| CD4 percentage (%), Mean (SD)                 | 36.4 (6.7)     |                    |         | 38.2 (7.9)     |                    |         |
| CD4 count (cells/mm <sup>3</sup> ), Mean (SD) | 985 (294)      |                    |         | 990 (341)      |                    |         |
| Age at ART start (months), Mean (SD)          | 8.5 (6.5)      |                    |         | 8.6 (6.8)      |                    |         |
| Age at ART start (months), N (%)              |                |                    |         |                |                    |         |
| <6                                            | 40 (46.5)      |                    |         | 47 (54.7)      |                    |         |
| 6-12                                          | 25 (29.1)      |                    |         | 17 (19.8)      |                    |         |
| >12                                           | 21 (24.4)      |                    |         | 22 (25.6)      |                    |         |

Abbreviations: HAZ – height-for-age Z-score; BAZ – BMI-for-age Z-score; ART – antiretroviral therapy

<sup>1</sup>Characteristics at the time of pQCT scan, unless specified
